# Supplementary material for: Not all 1p/19q non-codeleted oligodendroglial tumors are astrocytic
Source: PubMed Central journal article supplement (PMC5323103; doi:10.18632/oncotarget.11378), 2016-08-18
Supplement: oncotarget-07-64615-s001.pdf [file oncotarget-07-64615-s001.pdf]

## Not all 1p/19q non-codeleted oligodendroglial tumors are astrocytic

### Supplementary Material

Supplementary Table S1. Primers used for Direct Sequencing

| Gene         | Primer (F/R) | Sequence (5' to 3')      | Primer length (bp) | PCR product size (bp) | Annealing Temperature |
|--------------|--------------|--------------------------|--------------------|-----------------------|-----------------------|
| <i>IDH 1</i> | F            | CGGTCTTCAGAGAAGCCATT     | 20                 | 122                   | 60°C                  |
|              | R            | CACATTATTGCCAACATGAC     | 20                 |                       |                       |
| <i>IDH 2</i> | F            | AGCCCATCATCTGCAAAAAC     | 20                 | 150                   | 60°C                  |
|              | R            | CTAGGCGAGGAGCTCCAGT      | 19                 |                       |                       |
| <i>TP53</i>  | F5           | CCTGGTCCTCTGACTGCTCT     | 20                 | 242                   | 64°C                  |
| EXON 4       | R5           | TTCTGGGAAGGGACAGAAGA     | 20                 |                       |                       |
| <i>TP53</i>  | F3           | GTTCTTTCGTCGGCTCTC       | 19                 | 357                   | 60°C                  |
| EXON 5       | R3           | GGGCCAGACCTAAGAGCAAT     | 20                 |                       |                       |
| <i>TP53</i>  | F3           | GCTGGGGCTGGAGAGACGACAG   | 22                 | 260                   | 64°C                  |
| EXON 6       | R3           | TACTGCTCACCTGGAGGGCCACTG | 24                 |                       |                       |
| <i>TP53</i>  | F7           | CAAGGCGCACTGGCCTCAT      | 20                 | 216                   | 64°C                  |
| EXON 7       | R1           | GTCAGAGGCAAGCAGAGGCT     | 20                 |                       |                       |
| <i>TP53</i>  | F3           | CAAGGGTGGTTGGGAGTAGA     | 20                 | 327                   | 60°C                  |
| EXON 8       | R3           | AGGAAAGAGGCAAGGAAAGG     | 20                 |                       |                       |
| <i>TP53</i>  | F2           | GACCAAGGGTGCAGTTATGC     | 20                 | 196                   | 60°C                  |
| EXON 9       | R2           | CGGCATTTGAGTGTTAGACTG    | 22                 |                       |                       |
| <i>TERT</i>  | F2           | GTCCTGCCCCTTCACCTTC      | 19                 | 274                   | 68°C                  |
| Promoter     | R2           | AGCACCTCGCGGTAGTGG       | 18                 |                       |                       |

F, Forward; R, Reverse

**Supplementary Table S2. Somatic mutations of *TP53* in 1p/19q non-codeleted oligodendroglial tumors**

| Case NO. | Histology | Mutations         |                |               | Exon |
|----------|-----------|-------------------|----------------|---------------|------|
|          |           | Nucleotide change | Protein change | Mutation type |      |
| OA14     | OA(III)   | c.275C>T          | p.Pro92Leu     | missense      | 4    |
| OA116    | OA(II)    | c.524G>A          | p.Arg175His    | missense      | 5    |
| OA7      | OA(II)    | c.431A>G          | p.Gln144Arg    | missense      | 5    |
| OA13     | AOA(III)  | c.431A>G          | p.Gln144Arg    | missense      | 5    |
| O161     | O(III)    | c.659A>G          | p.Tyr220Cys    | missense      | 6    |
| OA118    | OA(II)    | c.579T>A          | p.His193Gln    | missense      | 6    |
|          |           | c.580C>T          | p.Leu194Phe    |               |      |
| OA4      | OA(II)    | c.659A>G          | p.Tyr220Cys    | missense      | 6    |
| OA89     | OA(II)    | c.578A>C          | p.His193Pro    | missense      | 6    |
| O101     | O(II)     | c.580C>T          | p.Leu194Phe    | missense      | 6    |
| OA24     | OA(II)    | c.743G>A          | p.Arg248Gln    | missense      | 7    |
| OA15     | OA(II)    | c.743G>A          | p.Arg248Gln    | missense      | 7    |
| OA20     | AOA(III)  | c.817C>T          | p.Arg273Cys    | missense      | 8    |
| OA122    | OA(II)    | c.799C>T          | p.Arg267Trp    | missense      | 8    |

O, oligodendroglioma; OA, oligoastrocytoma

**Supplementary Table S3. Molecular markers used for differentiation of gliogenesis lineage in this study**

| Technique            | Astrocytic lineage | oligodendroglial lineage |
|----------------------|--------------------|--------------------------|
| Immunohistochemistry | p53, ATRX          | PDGFRA                   |
| Direct sequencing    | <i>TP53</i>        | <i>TERT</i>              |
| FISH                 |                    | 1p/19q                   |

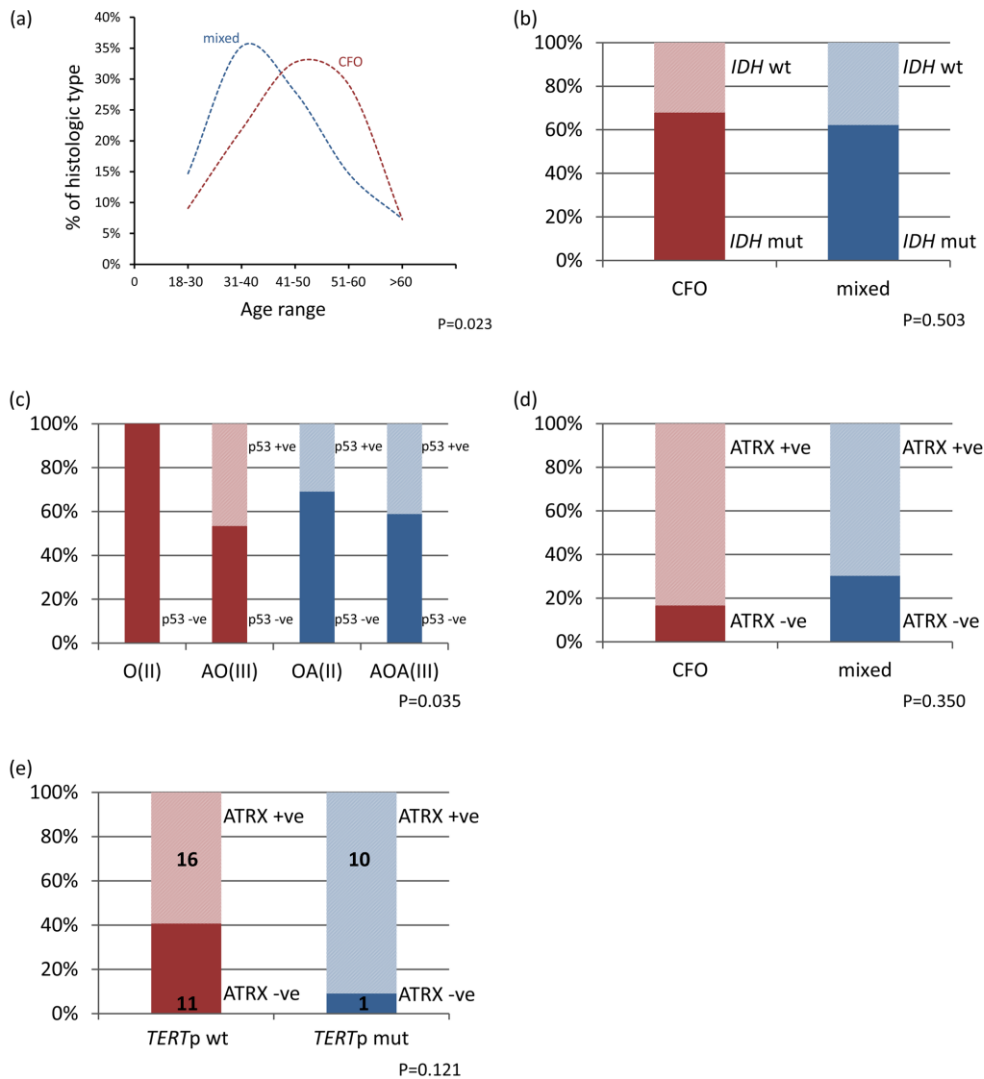

**Supplementary Figure S1. Correlation between clinicopathological and molecular variables of 1p/19q intact oligodendroglial tumors.** Patients with classic oligodendroglial histology were significantly older than those with mixed oligoastrocytic histology when excluding paediatric cases ( $p=0.023$ ) **a**. 1p/19q intact oligodendroglial tumors with classic oligodendroglial histology showed frequent *IDH* mutation (67.4%) **b**. Distribution of p53 positivity **c**. and ATRX positivity **d**. in 1p/19q non-codeleted oligodendroglial tumors according to histology. ATRX expression and *TERTp* mutation were mutually exclusive in all but one case among 1p/19q non-codeleted oligoastrocytomas **e**.
